# Supplementary material
Source: PubMed Central journal article supplement (PMC4288680)
Supplement: JB.02015-14_zjb999093433so1.pdf [file JB.02015-14_zjb999093433so1.pdf]

**The *rv1184c* locus encodes Chp2, an acyltransferase in *Mycobacterium tuberculosis* polyacyltrehalose lipid biosynthesis**

Megan H. Touchette, Cynthia M. Holsclaw, Mary L. Previti, Viven C. Solomon, Julie A. Leary, Carolyn R. Bertozzi, Jessica C. Seeliger

**SUPPLEMENTAL MATERIAL**

**Supplemental Table S1.** Bacterial strains and plasmids used in this study

**Supplemental Table S2.** Primers used in this study

**Supplemental Table S1. Bacterial strains and plasmids used in this study**

| <b>Strain</b>                           | <b>Name</b>       | <b>Genotype</b>                                                                                                | <b>Source</b> |
|-----------------------------------------|-------------------|----------------------------------------------------------------------------------------------------------------|---------------|
| <i>M. tuberculosis</i> Erdman           |                   |                                                                                                                |               |
| <i>M. tuberculosis</i> Erdman           |                   | $\Delta chp2$                                                                                                  | This work     |
| <i>M. tuberculosis</i> Erdman           |                   | $\Delta chp2::chp2$                                                                                            | This work     |
| <i>M. tuberculosis</i> Erdman           |                   | $\Delta papA3$                                                                                                 | Ref [1]       |
| <i>M. tuberculosis</i> Erdman           |                   | $\Delta papA3::papA3$                                                                                          | Ref [1]       |
| <i>M. tuberculosis</i> Erdman           | jcm110            | $\Delta mmpL10$                                                                                                | J. Cox        |
| <i>M. smegmatis</i> mc <sup>2</sup> 155 |                   |                                                                                                                |               |
| <b>Plasmids</b>                         |                   |                                                                                                                |               |
| <b>Reference name</b>                   | <b>Name</b>       | <b>Description</b>                                                                                             | <b>Source</b> |
|                                         | pMV261            | Kn <sup>r</sup> , pAL5000 origin, ColE1 origin, multiple cloning site, P <sub><i>hsp60</i></sub>               | Ref [2]       |
|                                         | pMV306            | Kn <sup>r</sup> , <i>int</i> , attA5, ColE1 origin, multiple cloning site                                      | Ref [3]       |
|                                         | pJSC407           | oriE, cosA; HygR flanked by loxP sites                                                                         | Ref [4]       |
| $\Delta chp2$ KO construct              |                   | pJSC407; HindIII-804bp (first 156bp of <i>chp1</i> )-Hyg <sup>r</sup> -813bp (last 157bp of <i>chp1</i> )-KpnI | This work     |
|                                         | pRibo-BsaHind     | pMV261 derivative; P <sub><i>hsp60</i></sub> -theophylline riboswitch; BsaI for cloning                        | Ref [5]       |
| Chp2-3xFLAG                             | pRibo Chp2-3xFLAG | pRibo-BsaHind derivative; contains <i>chp2</i> fused to 3xFLAG                                                 | This work     |
| AP cytosolic control                    | pMB111            | pMV261 derivative; contains <i>phoA</i>                                                                        | M. Braunstein |
| AP secreted control                     | pMB124            | pMV261 derivative; contains <i>fbpB(aa2-40)-phoA</i>                                                           | M. Braunstein |
| $\beta$ Gal cytosolic control           | pHsp- <i>lacZ</i> | pMWS114 derivative; P <sub><i>hsp60</i></sub> - <i>lacZ</i>                                                    | Ref [5]       |
| $\beta$ Gal secreted control            | sec- <i>lacZ</i>  | pMB124 derivative; P <sub><i>hsp60</i></sub> - <i>fbpB(aa2-40)-lacZ</i>                                        | Ref [5]       |
| full-length Chp2- $\beta$ Gal           |                   | pRibo-BsaHind derivative; contains full-length <i>chp2</i> fused to <i>lacZ</i>                                | This work     |
| N-term Chp2- $\beta$ Gal                |                   | pRibo-BsaHind derivative; contains <i>chp2</i> (aa1-39) fused to <i>lacZ</i>                                   | This work     |
| cat Chp2- $\beta$ Gal                   |                   | pRibo-BsaHind derivative; contains <i>chp2</i> (aa26-359) fused to <i>lacZ</i>                                 | This work     |

| Reference name                  | Name | Description                                                                     | Source    |
|---------------------------------|------|---------------------------------------------------------------------------------|-----------|
| full-length Chp2-AP             |      | pRibo-BsaHind derivative; contains full-length <i>chp2</i> fused to <i>phoA</i> | This work |
| N-term Chp2-AP                  |      | pRibo-BsaHind derivative; contains <i>chp2</i> (aa1-39) fused to <i>phoA</i>    | This work |
| cat Chp2-AP                     |      | pRibo-BsaHind derivative; contains <i>chp2</i> (26-359) fused to <i>phoA</i>    | This work |
| <i>chp2</i>                     |      | pMV306 derivative; contains 1kb upstream of <i>fadD21</i> ; <i>chp2</i>         | This work |
| <i>mmpL10</i>                   |      | pMV306 derivative; contains 1kb upstream of <i>pks3/4</i> ; <i>mmpL10</i>       | This work |
| $P_{native2kb}$ - <i>mmpL10</i> |      | pMV306 derivative; contains 2kb upstream of <i>pks3/4</i>                       | This work |
| $P_{hsp60}$ - <i>mmpL10</i>     |      | pMV306 derivative; $P_{hsp60}$ - <i>mmpL10</i>                                  | This work |
| $P_{gs}$ - <i>mmpL10</i>        |      | pMV306 derivative; $P_{gs}$ - <i>mmpL10</i>                                     | This work |
|                                 | 2BT  | LIC vector with N-terminal 6xHis, TEV protease site, SspI site                  | S. Gradia |
| Chp2-cat                        |      | 2BT derivative; 6XHis-TEV- <i>chp2</i> (aa26-359)                               | This work |

## References

1. Hatzios, S. K., et al. (2009) PapA3 is an acyltransferase required for polyacyltrehalose biosynthesis in *Mycobacterium tuberculosis*, *J Biol Chem* 284, 12745-12751.
2. Stover, C. K., et al. (1991) New use of BCG for recombinant vaccines, *Nature* 351, 456-460.
3. Stover, C. K., et al. (1993) Protective immunity elicited by recombinant bacille Calmette-Guerin (BCG) expressing outer surface protein A (OspA) lipoprotein: a candidate Lyme disease vaccine, *J Exp Med* 178, 197-209.
4. Stanley, S. A., et al. (2003) Acute infection and macrophage subversion by *Mycobacterium tuberculosis* require a specialized secretion system, *PNAS* 100, 13001-13006.
5. Seeliger, J. C., et al. (2012) A Riboswitch-Based Inducible Gene Expression System for Mycobacteria, *PLoS ONE* 7, e29266.

## Supplemental Table S2. Primers used in this study

| Name (purpose)                                             | Sequence (cloning strategy)                              |
|------------------------------------------------------------|----------------------------------------------------------|
| <b>pJSC407 <math>\Delta</math>chp2</b> (knockout)          | (by assembly PCR across HygR cassette)                   |
| <u>HindIII</u> 5' flank                                    | ggatccacgaagcttCGAGACACGGCACACCTTTG                      |
| 5' flank- <u>loxP</u>                                      | ACGCTTCAACCGCCAAAGTCggtggcccgtataacttcg                  |
| 5' flank- <u>loxP</u> revcomp                              | cgaagttataccggggccaccGACTTTGGCGGTTGAAGCGT                |
| <u>loxP</u> -3' flank                                      | GAACTGTACCGGATTTTCGGACGCTGCAACCACAGATCGACG               |
| <u>loxP</u> -3' flank revcomp                              | CGTCGATCTGTGGTTGCAGCGTCCGAAATCCGGTACAGTTC                |
| 3' flank <u>KpnI</u> revcomp                               | gactagagggtagaccGTTACCCGGTCATGCTGAGG                     |
| <b><math>\Delta</math>chp2 PCR</b> (knockout confirmation) |                                                          |
| chp2 KO confirm REV                                        | CGTCATGTTGTCTTGGTGGCTC                                   |
| fadD21 FOR                                                 | GGCCACATAAAGAGTCGCTTCC                                   |
| hygR confirm REV                                           | CAGGCTCGCGTAGGAATCATC                                    |
| <b><math>\Delta</math>mmpL10 PCR</b> (knockout confirm.)   |                                                          |
| papA3 FOR                                                  | GCTGAAGTCTGTGTTCCAACGAGTC                                |
| mmpL10 internal REV                                        | GTCTTCGTGCGCGCTGACATC                                    |
| chp2 REV*                                                  | GTCGATCGTACGCTAGTTAACCGTGGATCCGGTGCGAG                   |
| hygR confirm REV                                           | <i>same as above</i>                                     |
| <b>pMV306 chp2</b> (complement)                            | (in two cloning steps via XbaI-HindIII and HindIII-ClaI) |
| 5' fadD21 promoter <u>XbaI</u>                             | GCTCTAGAgggtgctgcggtgctg                                 |
| fadD21 promoter 3' <u>HindIII</u>                          | CTTCATAAGCTTCATtggtgctacattaccgtttc                      |
| chp2 5' <u>HindIII</u> for pMV306                          | ccaATGAAGCTTAAGCGAGTGATTGCGGGAG                          |
| chp2 3' <u>ClaI</u> for pMV306                             | GTCGACATCGATTTAGCCGCCGAAGGCGG                            |
| <b>2BT chp2-cat</b> ( <i>E. coli</i> expression)           | (by InFusion into SspI-cleaved 2BT)                      |
| 5' chp2-cat FOR                                            | GTACTIONCAATCCAATGCAAGCGAACCCGCGTACC                     |
| 3' chp2-cat REV                                            | TTATCCACTTCCAATtcattaGCCGCCGAAGGCGG                      |
| chp2 <u>S141A</u> QC FOR                                   | GTCGGCCTAgCCCAGGGTTCCTCGTGCTC                            |
| chp2 S141A QC REV                                          | GGAACCCCTGGGcTAGGCCGACGGCCGCGG                           |
| <b>chp2 SA</b> (Ser141Ala mutagenesis)                     | (by site-directed mutagenesis)                           |
| S141A FOR                                                  | GTCGGCCTAgCCCAGGGTTCCTCGTGCTC                            |
| S141A REV                                                  | GGAACCCCTGGGcTAGGCCGACGGCCGCGG                           |

\* Originally designed as a cloning primer. Only underlined portion is complementary to *chp2*.
